# Supplementary material for: C–N Bond formation via ligand-induced nucleophilicity at a coordinated triamidoamine ligand
Source: Royal Society of Chemistry journal article supplement (doi:10.1039/c1cc15179g), 2011-01-01
Supplement: c1cc15179g.pdf [file c1cc15179g.pdf]

Supporting Information for

**C–N Bond Formation via Ligand-Induced Nucleophilicity at a Coordinated  
Triamidoamine Ligand**

Annalese F. Maddox,<sup>a</sup> Karla A. Erickson,<sup>a</sup> Joseph M. Tanski,<sup>b</sup> and Rory Waterman<sup>a,\*</sup>

<sup>a</sup>Department of Chemistry, University of Vermont, Burlington, VT 05405-0125 and

<sup>b</sup>Department of Chemistry, Vassar College, Poughkeepsie, NY, 12604

**General Considerations**

All reactions were performed under a nitrogen atmosphere with dry, oxygen-free solvents using an M. Braun glovebox. Celite-454 was heated to a temperature above 180 °C under dynamic vacuum for at least 8 h. Benzene-*d*<sub>6</sub> was purchased from Cambridge Isotope Laboratory, degassed, and dried over NaK alloy. Elemental analyses were performed on an Elementar microCube. NMR spectra were recorded with either a Bruker ARX or Varian Inova 500 MHz spectrometer in benzene-*d*<sub>6</sub> and are reported with reference to residual solvent resonances ( $\delta = 7.16$  and 128.0) unless otherwise noted. A Varian Inova 500 spectrometer was used to record HMQC spectra with a standard pulse sequence. Infrared spectra were collected on a Bruker Alpha FT-IR with an ATR plate at a resolution of 1 cm<sup>-1</sup>. Complexes **1a**,<sup>1</sup> **1b**,<sup>1</sup> **3**,<sup>2</sup> and **5**<sup>2</sup> were prepared according to reported procedures. All other chemicals were obtained from commercial suppliers and dried or purified by conventional means.

**[N,N,N,N,N,N-N(CH<sub>2</sub>CH<sub>2</sub>NSiMe<sub>3</sub>)<sub>2</sub>(CH<sub>2</sub>CH<sub>2</sub>NC(N<sup>*i*</sup>PrSiMe<sub>3</sub>)(N<sup>*i*</sup>Pr))]ZrNH<sup>*i*</sup>Bu (2a)**. A cold, 2 mL ethereal solution of *N,N'*-diisopropylcarbodiimide (40 mg, 0.32 mmol) was added drop-wise to a cold, 3 mL ethereal solution of **1a** (184 mg, 0.35 mmol), and the resulting solution was stirred at ambient temperature 14 h. The solution was then filtered through Celite, concentrated until incipient crystallization under reduced pressure

then warmed sufficiently to redissolve solids, and cooled to  $-30\text{ }^{\circ}\text{C}$  yielding 73 mg (0.113 mmol, 65% relative to carbodiimide) of colorless crystals.  $^1\text{H}$  (500.1 MHz): 4.15 (s, NH, 1 H), 3.95 (septet, CH, 1 H), 3.39 (m, CH<sub>2</sub>, 2 H), 3.22 (m, CH, 1 H), 3.17 (m, CH<sub>2</sub>, 2 H), 3.00 (m, CH<sub>2</sub>, 2 H), 2.45 (m, CH<sub>2</sub>, 2 H), 2.34 (m, CH<sub>2</sub>, 4 H), 1.60 (s, C(CH<sub>3</sub>)<sub>3</sub>, 9 H), 1.45 (d, CH(CH<sub>3</sub>)<sub>2</sub>,  $J = 10\text{ Hz}$ , 3 H), 1.40 (d, CH(CH<sub>3</sub>)<sub>2</sub>,  $J = 5\text{ Hz}$ , 3 H), 1.07 (d, CH(CH<sub>3</sub>)<sub>2</sub>,  $J = 5\text{ Hz}$ , 3 H), 1.03 (d, CH(CH<sub>3</sub>)<sub>2</sub>,  $J = 5\text{ Hz}$ , 3 H), 0.42 (s, CH<sub>3</sub>, 9 H), 0.38 (s, CH<sub>3</sub>, 9H), 0.15 (s, CH<sub>3</sub>, 9 H)  $^{13}\text{C}\{^1\text{H}\}$  (125.8 MHz): 170.8 (s, C=N), 59.1 (s, CH<sub>2</sub>), 57.2 (s, CH<sub>2</sub>), 54.9 (s, CH<sub>2</sub>), 49.6 (s, CH), 48.3 (s, CH<sub>2</sub>), 48.0(s, CH<sub>2</sub>), 48.0(s, CH), 44.9 (s, CH<sub>2</sub>), 34.9 (s, CH<sub>3</sub>), 27.3 (s, CH<sub>3</sub>), 26.2 (s, CH<sub>3</sub>), 25.3 (s, CH<sub>3</sub>), 23.52 (s, CH<sub>3</sub>), 23.1 (s, CH<sub>3</sub>), 2.7 (s, CH<sub>3</sub>), 2.6 (s, CH<sub>3</sub>), 2.0 (s, CH<sub>3</sub>). IR: 3209 s ( $\nu_{\text{NH}}$ ), 2951 m, 2506 s, 1658 s ( $\nu_{\text{CN}}$ ), 1587 s, 1488 m, 1436 m, 1382 w, 1357 w, 1239 m, 1200 m, 1153 w, 1116 w, 1065 w, 1033 w, 1000 w, 972 m, 940 m, 906 m, 827 s, 783 s, 743 s, 680 m, 582 m, 556 w, 524 w, 442 w, 423 w. Anal. Calcd. for C<sub>26</sub>H<sub>63</sub>N<sub>7</sub>Si<sub>3</sub>Zr: C, 48.09; H, 9.78; N, 15.10. Found: C, 47.72; H, 9.65; N, 14.97.

**[N,N,N,N,N,N-N(CH<sub>2</sub>CH<sub>2</sub>NSiMe<sub>3</sub>)<sub>2</sub>(CH<sub>2</sub>CH<sub>2</sub>NC(N<sup>*i*</sup>PrSiMe<sub>3</sub>)(N<sup>*i*</sup>Pr))]ZrNHPPh (2b).** A 2 mL benzene solution of *N,N'*-diisopropylcarbodiimide (46 mg, 0.36 mmol) was added drop-wise to a 5 mL benzene solution of **1b** (200 mg, 0.37 mmol) and stirred 1 h. The resulting solution was filtered through Celite and lyophilized. The powder was dissolved in minimal pentane, and the solution was filtered then concentrated before cooling to  $-30\text{ }^{\circ}\text{C}$  to afford 237 mg (0.35 mmol, 97%) of **2b** as a colorless microcrystalline powder.  $^1\text{H}$  (500.1 MHz): 7.33 (t, C<sub>6</sub>H<sub>5</sub>,  $J = 5\text{ Hz}$ , 2 H), 6.95 (d, C<sub>6</sub>H<sub>5</sub>,  $J = 5\text{ Hz}$ , 2 H), 6.78 (t, C<sub>6</sub>H<sub>5</sub>,  $J = 5\text{ Hz}$ , 1 H), 6.35 (s, NH, 1 H) 3.94 (m, CH<sub>2</sub>, 2 H), 3.48 (m, CH, 2 H) 3.27 (m, CH, 2H), 3.15 (m, CH<sub>2</sub>, 2 H), 3.05 (m, CH<sub>2</sub>, 2 H), 2.62 (m, CH<sub>2</sub>, 2

H), 2.38 (m, CH<sub>2</sub>, 2 H), 2.31 (m, CH, 2 H), 1.63 (d, CH(CH<sub>3</sub>)<sub>2</sub>, *J* = 5 Hz, 3 H), 1.55 (d, CH(CH<sub>3</sub>)<sub>2</sub>, *J* = 5 Hz, 3 H), 1.02 (d, CH(CH<sub>3</sub>)<sub>2</sub>, *J* = 5 Hz, 3 H), 0.98 (d, CH(CH<sub>3</sub>)<sub>2</sub>, *J* = 5 Hz, 3 H), 0.49 (s, CH<sub>3</sub>, 9 H), 0.46 (s, CH<sub>3</sub>, 9 H), 0.12 (s, CH<sub>3</sub>, 9 H) <sup>13</sup>C{<sup>1</sup>H} (125.8 MHz): 171.7 (s, C=N), 128.51 (s, CH), 118.3 (s, CH), 115.7 (s, CH), 56.3 (s, CH<sub>2</sub>), 56.0 (s, CH<sub>2</sub>), 54.1 (s, CH), 49.0 (s, CH<sub>2</sub>), 48.9 (s, CH<sub>2</sub>), 48.2 (s, CH), 44.1 (s, CH<sub>2</sub>), 44.0 (s, CH<sub>2</sub>), 26.0 (s, CH<sub>3</sub>), 25.0 (s, CH<sub>3</sub>), 24.6 (s, CH<sub>3</sub>), 23.1 (s, CH<sub>3</sub>), 2.2 (s, CH<sub>3</sub>), 2.0 (s, CH<sub>3</sub>), 1.3 (s, CH<sub>3</sub>). IR: 3230 s (ν<sub>NH</sub>), 2948 m, 2510 s, 1646 s (ν<sub>CN</sub>), 1590 s, 1487 m, 1457 m, 1439 m, 1381 w, 1365 w, 1333 w, 1279 m, 1240 m, 1210 m, 1152 w, 1128 w, 1067 m, 1029 m, 1002 m, 938 s, 901 s, 828 s, 785 s, 748 s, 691s, 678 m, 659 m, 585 m, 573 m, 520 m, 481 m, 440 m. Anal. Calcd. for C<sub>28</sub>H<sub>59</sub>N<sub>7</sub>Si<sub>3</sub>Zr: C, 50.25; H, 8.89; N, 14.65. Found: C, 50.16; H, 9.01; N, 14.52.

**[*N,N,N,N,N,N*-N(CH<sub>2</sub>CH<sub>2</sub>NSiMe<sub>3</sub>)<sub>2</sub>(CH<sub>2</sub>CH<sub>2</sub>NC(<sup>*i*</sup>PrSiMe<sub>3</sub>)(<sup>*i*</sup>Pr))]ZrCl (**4**).**

A 2 mL benzene solution of *N,N'*-diisopropylcarbodiimide (52 mg, 0.41 mmol) was added drop-wise to a 5 mL benzene solution of **3** (200 mg, 0.41 mmol) and stirred for 30 min at ambient temperature. The resulting solution was filtered through Celite and lyophilized. The powder was dissolved in minimal pentane, and the solution was filtered then concentrated before cooling to -30 °C to afford 250 mg (0.40 mmol, 98%) of **4** as a colorless microcrystalline powder. <sup>1</sup>H (500.1 MHz): 3.94 (m, CH, 1 H), 3.45 (m, CH<sub>2</sub>, 2 H), 3.24 (m, CH<sub>2</sub>, 2 H), 3.13 (m, CH<sub>2</sub>, 2 H), 3.06 (m, CH<sub>2</sub>, 2 H), 2.59 (m, CH<sub>2</sub>, 2 H), 2.36 (m, CH<sub>2</sub>, 2 H), 2.30 (m, CH, 1 H), 1.63 (d, CH(CH<sub>3</sub>)<sub>2</sub>, *J* = 5 Hz, 3 H), 1.56 (d, CH(CH<sub>3</sub>)<sub>2</sub>, *J* = 5 Hz, 3 H), 1.01 (d, CH(CH<sub>3</sub>)<sub>2</sub>, *J* = 5 Hz, 3 H), 0.98 (d, CH(CH<sub>3</sub>)<sub>2</sub>, *J* = 5 Hz, 3 H), 0.47 (s, CH<sub>3</sub>, 9 H), 0.46 (s, CH<sub>3</sub>, 9 H), 0.12 (s, CH<sub>3</sub>, 9 H). <sup>13</sup>C{<sup>1</sup>H} (125.8 MHz): 171.7 (s, C=N), 55.9 (s, CH<sub>2</sub>), 55.9 (s, CH<sub>2</sub>), 54.0 (s, CH), 48.9 (s, CH<sub>2</sub>), 48.9 (s, CH<sub>2</sub>), 48.0 (s,

CH), 44.0(s, CH<sub>2</sub>), 43.9 (s, CH<sub>2</sub>), 25.8 (s, CH<sub>3</sub>), 24.9 (s, CH<sub>3</sub>), 24.5 (s, CH<sub>3</sub>), 23.07 (s, CH<sub>3</sub>), 2.2 (s, CH<sub>3</sub>), 1.9 (s, CH<sub>3</sub>), 1.3 (s, CH<sub>3</sub>). IR: 2952 w, 2896 w, 2859 w, 1621 w (ν<sub>CN</sub>), 1490 m, 1472 m, 1448 m, 1421 m, 1327 w, 1243 m, 1219 m, 1150 w, 1116 w, 1046 w, 972 m, 916 s, 828 s, 746 s, 678 m, 616 m, 546 w, 404 w. Anal. Calcd. for C<sub>22</sub>H<sub>53</sub>ClN<sub>6</sub>Si<sub>3</sub>Zr: C, 43.13; H, 8.72; N, 13.72. Found: C, 42.80; H, 8.65; N, 13.47.

**[*N,N,N,N,N,N*-N(CH<sub>2</sub>CH<sub>2</sub>NSiMe<sub>3</sub>)<sub>2</sub>(CH<sub>2</sub>CH<sub>2</sub>NC(N<sup>*i*</sup>PrSiMe<sub>3</sub>)(N<sup>*i*</sup>Pr))]ZrMe**

**(6).** A 1.5 mL benzene solution of *N,N'*-diisopropylcarbodiimide (30 mg, 0.24 mmol) was added to 2 mL benzene solution of **5** (105 mg, 0.23 mmol) at -30 °C, and the resulting solution was stirred for 30 min while gradually warming to ambient temperature. The solution was lyophilized yielding 85 mg (0.14 mmol, 63%) of product. Colorless crystals were obtained from a cooled ether solution. <sup>1</sup>H (500.1 MHz): 3.85 (m, CH(CH<sub>3</sub>)<sub>2</sub>, 1H), 3.46 (m, CH<sub>2</sub>, 2H), 3.27 (m, CH<sub>2</sub>, 2H), 3.21 (m, CH(CH<sub>3</sub>)<sub>2</sub>, 1H), 3.1 (m, CH<sub>2</sub>, 1H), 3.02 (m, CH<sub>2</sub>, 1H), 2.38 (m, CH<sub>2</sub>, 2H), 2.25 (m, CH<sub>2</sub>, 2H), 2.19 (m, CH<sub>2</sub>, 2H), 1.41 (d, CH(CH<sub>3</sub>)<sub>2</sub>, *J* = 6.5 Hz, 3H), 1.37 (d, CH(CH<sub>3</sub>)<sub>2</sub>, *J* = 6.5 Hz, 3H), 1.08 (d, CH(CH<sub>3</sub>)<sub>2</sub>, *J* = 6.5 Hz, 3H), 1.03 (d, CH(CH<sub>3</sub>)<sub>2</sub>, *J* = 6.5 Hz, 3H), 0.64 (s, CH<sub>3</sub>, 3H), 0.39 (s, CH<sub>3</sub>, 3H), 0.37 (s, CH<sub>3</sub>, 3H), 0.15 (s, CH<sub>3</sub>, 3H). <sup>13</sup>C{<sup>1</sup>H} (125.8 MHz): 171 (s, C=N), 59.1 (s, CH<sub>2</sub>), 56.8 (s, CH<sub>2</sub>), 49.5 (s, CH), 47.7 (s, CH<sub>2</sub>), 47.5 (s, CH<sub>2</sub>), 47.4 (s, CH<sub>2</sub>), 45.1 (s, CH), 34.9 (s, CH<sub>3</sub>), 25.6 (s, CH<sub>3</sub>), 24.8 (s, CH<sub>3</sub>), 23.7 (s, CH<sub>3</sub>), 1.81 (s, CH<sub>3</sub>), 1.72 (s, CH<sub>3</sub>), 1.59 (s, CH<sub>3</sub>). IR: 2958 w, 2842 w, 2170 m, 1489 m, 1438 m, 1243 m, 1201 m, 1078 m, 903 m, 825 m, 736 m, 579 m, 425 m. Anal. Calcd. for C<sub>23</sub>H<sub>56</sub>N<sub>6</sub>Si<sub>3</sub>Zr: C, 46.65; H, 9.53; N, 14.19. Found: C, 45.98; H, 9.55; N, 13.97

**X-Ray structure determinations.** X-Ray diffraction data were collected on a Bruker APEX 2 CCD platform diffractometer (MoKα, λ = 0.71073 Å) at 125 K. Suitable

crystals of each complex **2a** and **4** were mounted in a nylon loop with Paratone-N cryoprotectant oil. The structures were solved using direct methods and standard difference map techniques and were refined by full-matrix least squares procedures on  $F^2$  with SHELXTL (version 6.14).<sup>3</sup> All non-hydrogen atoms were refined anisotropically. Hydrogen atoms on carbon were included in calculated positions and were refined using a riding model. The hydrogen atom on nitrogen atom N(5) of **2a**, H(5), was located in the Fourier difference map and refined freely.

**Table SI-1.** Crystal data and structure refinement parameters for **2a** and **4**.

| <b>compounds</b>                                                          | <b>2a</b>                                                         | <b>4</b>                                                            |
|---------------------------------------------------------------------------|-------------------------------------------------------------------|---------------------------------------------------------------------|
| formula                                                                   | C <sub>26</sub> H <sub>63</sub> N <sub>7</sub> Si <sub>3</sub> Zr | C <sub>22</sub> H <sub>53</sub> ClN <sub>6</sub> Si <sub>3</sub> Zr |
| MW                                                                        | 649.32                                                            | 612.64                                                              |
| crystal system                                                            | triclinic                                                         | triclinic                                                           |
| <i>a</i> /Å                                                               | 10.3406(5)                                                        | 9.517(3)                                                            |
| <i>b</i> /Å                                                               | 10.3645(5)                                                        | 10.057(4)                                                           |
| <i>c</i> /Å                                                               | 17.2962(8)                                                        | 19.313(6)                                                           |
| $\alpha$ /°                                                               | 88.5340(10)                                                       | 76.739(5)                                                           |
| $\beta$ /°                                                                | 87.1460(10)                                                       | 80.800(3)                                                           |
| $\gamma$ /°                                                               | 77.7520(10)                                                       | 62.440(3)                                                           |
| <i>V</i> /Å <sup>3</sup>                                                  | 1809.07(15)                                                       | 1592.0(10)                                                          |
| space group                                                               | P-1                                                               | P-1                                                                 |
| <i>Z</i>                                                                  | 2                                                                 | 2                                                                   |
| $\theta$ range/°                                                          | 2.01 to 31.95                                                     | 2.17 to 27.88                                                       |
| <i>m</i> /mm <sup>-1</sup>                                                | 0.428                                                             | 0.563                                                               |
| <i>N</i>                                                                  | 30146                                                             | 7558                                                                |
| <i>N</i> <sub>ind</sub>                                                   | 11517                                                             | 7558                                                                |
| <i>R</i> <sub>int</sub>                                                   | 0.0245                                                            | 0.0000                                                              |
| <i>R</i> <sub>1</sub> <sup>a</sup> ( <i>I</i> > 2 <i>s</i> ( <i>I</i> ))  | 0.0329                                                            | 0.0260                                                              |
| <i>wR</i> <sub>2</sub> <sup>b</sup> ( <i>I</i> > 2 <i>s</i> ( <i>I</i> )) | 0.0804                                                            | 0.0616                                                              |
| $\Delta\rho_{\max}$ ; $\Delta\rho_{\min}$ /e Å <sup>3</sup>               | 1.013; -0.463                                                     | 0.815; -0.293                                                       |
| GoF on <i>R</i> <sub>1</sub>                                              | 1.034                                                             | 1.048                                                               |

$$^a R_1 = \frac{\sum (|F_o| - |F_c|)}{\sum |F_o|}$$

$$^b wR_2 = \left\{ \frac{\sum [w(F_o^2 - F_c^2)^2]}{\sum [w(F_o^2)^2]} \right\}^{1/2}$$

## References

1. A. J. Roering, A. F. Maddox, L. T. Elrod, S. M. Chan, M. B. Ghebreab, K. L. Donovan, J. J. Davidson, R. P. Hughes, T. Shalumova, S. N. MacMillan, J. M. Tanski and R. Waterman, *Organometallics*, 2009, **29**, 573–581.
2. R. Waterman, *Organometallics*, 2007, **27**, 2492–2494.
3. Sheldrick, G. M. *Acta Cryst.* **2008**, *A64*, 112–122
